# Supplementary material
Source: PubMed Central journal article supplement (PMC3697491)
Supplement: AEM.00832-13_zam999104526so1.pdf [file AEM.00832-13_zam999104526so1.pdf]

**Table S1.** List of Q33 and BM13 (respectively) putative open reading frames and their predicted functions or highest phage homologues

| Q33     |                |               |           |                |                         |                                                                                    |                 |
|---------|----------------|---------------|-----------|----------------|-------------------------|------------------------------------------------------------------------------------|-----------------|
| Orf no. | Start position | Stop position | Size (aa) | Mol. Wt. (kDa) | Putative Function       | Highest BlastP phage hit*                                                          | % identity (aa) |
| 1       | 390            | 614           | 74        | 8.5            | cro                     | P335 cro                                                                           | 100 (74)        |
| 2       | 641            | 859           | 72        | 8.1            |                         | <i>L. lactis</i> MG1363 prophage protein                                           | 92 (72)         |
| 3       | 869            | 1609          | 246       | 28.4           | Anti-repressor          | Phage regulatory protein <i>Bacillus</i> sp., putative anti-repressor              | 41 (237)        |
| 4       | 1621           | 1836          | 71        | 8.3            |                         | bIL285/bIL286 Orf11, hypothetical protein                                          | 100 (71)        |
| 5       | 1951           | 2346          | 131       | 14.9           |                         | ul36 Orf131, hypothetical protein                                                  | 100 (131)       |
| 6       | 2355           | 3113          | 252       | 28.8           | sak                     | ul36 Sak, single-strand annealing protein                                          | 100 (252)       |
| 7       | 3106           | 3564          | 152       | 16.9           | SSB                     | TP901-1, single-strand DNA binding prot.                                           | 87 (152)        |
| 8       | 3734           | 4516          | 260       | 29.3           | Replication protein     | bIL285/ul36 DNA replication protein                                                | 99 (260)        |
| 9       | 4516           | 5241          | 241       | 27.2           | Topoisomerase           | bIL285 Orf17 topoisomerase                                                         | 99 (241)        |
| 10      | 5238           | 5627          | 129       | 15.7           | Resolvase               | bIL285 RusA, Holliday junction resolvase                                           | 100 (129)       |
| 11      | 5630           | 5773          | 47        | 5.3            |                         | Ul36 Orf129, hypothetical, pseudogene                                              | 100 (937)       |
| 12      | 6224           | 5874          | 116       | 13.3           |                         | <i>L. lactis</i> KF147 integrase, pseudogene                                       | 95 (84)         |
| 13      | 6585           | 6286          | 99        | 11.3           |                         | <i>S. parauberis</i> DNA-binding protein                                           | 41 (97)         |
| 14      | 6820           | 6921          | 63        | 7.5            |                         | <i>S. suis</i> repressor-related protein, cro                                      | 52 (63)         |
| 15      | 7140           | 7814          | 224       | 26.0           |                         | <i>L. lactis</i> KF147 phage regulatory protein                                    | 97 (219)        |
| 16      | 7894           | 9588          | 564       | 64.7           |                         | <i>L. garvieae</i> phage protein, hypothetical                                     | 53 (558)        |
| 17      | 10054          | 10260         | 69        | 7.5            |                         | hypothetical                                                                       |                 |
| 18      | 10376          | 10582         | 68        | 8.3            |                         | ul36 Orf68a, hypothetical                                                          | 99 (68)         |
| 19      | 10591          | 10701         | 40        | 4.8            |                         | hypothetical                                                                       |                 |
| 20      | 10736          | 10915         | 62        | 7.3            |                         | Tuc2009 Orf21, hypothetical                                                        | 98 (59)         |
| 21      | 10905          | 11474         | 189       | 22.5           |                         | Q30, hypothetical                                                                  | 98 (186)        |
| 22      | 11484          | 11756         | 90        | 10.5           |                         | bIL285 Orf26, hypothetical                                                         | 98 (90)         |
| 23      | 11759          | 12019         | 102       | 12.3           |                         | <i>L. garvieae</i> phage protein, hypothetical                                     | 85 (71)         |
| 24      | 12016          | 12381         | 121       | 14.0           |                         | Ul36.t1k1, hypothetical                                                            | 100 (121)       |
| 25      | 12378          | 12800         | 140       | 15.4           | dUTPase                 | phiLC3 Orf141 dUTPase                                                              | 99 (136)        |
| 26      | 12889          | 13134         | 81        | 8.9            |                         | P335, hypothetical                                                                 | 98 (81)         |
| 27      | 13181          | 13423         | 80        | 9.4            |                         | Phi31.1 Orf80, hypothetical                                                        | 99 (80)         |
| 28      | 13420          | 13614         | 64        | 7.7            |                         | bIL286 Orf33                                                                       | 95 (64)         |
| 29      | 13761          | 13949         | 62        | 7.3            |                         | ul36.k1t1, hypothetical                                                            | 79 (52)         |
| 30      | 13946          | 14404         | 152       | 18.1           |                         | hypothetical                                                                       |                 |
| 31      | 14567          | 14965         | 132       | 14.8           |                         | hypothetical                                                                       |                 |
| 32      | 14955          | 16196         | 413       | 46.9           | Terminase               | <i>E. faecalis phage</i> phiFL4A, terminase large subunit                          | 66 (410)        |
| 33      | 16196          | 17551         | 455       | 51.9           | Portal                  | <i>E. faecalis phage</i> phiFL4A, portal protein                                   | 55 (452)        |
| 34      | 17626          | 18621         | 331       | 37.3           | Capsid protein          | <i>E. faecalis phage</i> phiFL4A gp35, capsid                                      | 48 (275)        |
| 35      | 18791          | 18925         | 44        |                |                         | hypothetical                                                                       |                 |
| 36      | 19067          | 19669         | 200       | 23.1           | Scaffolding protein     | <i>C. perfringens</i> phage minor structural protein, possible scaffolding protein | 36 (174)        |
| 37      | 19681          | 19929         | 82        | 8.7            |                         | hypothetical                                                                       |                 |
| 38      | 19945          | 20841         | 298       | 32.1           | Major Capsid protein    | <i>S. suis</i> major capsid protein                                                | 57 (291)        |
| 39      | 20977          | 21543         | 188       | 21.5           |                         | <i>E. faecalis</i> phiFL4A gp41, hypothetical                                      | 50 (188)        |
| 40      | 21545          | 21865         | 106       | 12.1           | Head-tail connector     | <i>E. faecalis phage</i> phiFL4A gp42                                              | 52 (105)        |
| 41      | 21870          | 22289         | 139       | 15.3           |                         | <i>E. faecalis phage</i> phiFL4A gp43, possible activator of gpU (gpZ)             | 53 (135)        |
| 42      | 22289          | 22660         | 123       | 14.7           |                         | <i>E. faecalis phage</i> phiFL4A gp44, possible tail terminator (gpU)              | 39 (122)        |
| 43      | 22660          | 23508         | 282       | 29.7           | Major tail protein      | <i>E. faecalis phage</i> phiFL4A gp45,                                             | 46 (199)        |
| 44a     | 23533          | 23880         | 115       | 12.7           |                         | <i>E. faecalis phage</i> phiFL4A, chaperone gpG                                    | 36 (143)        |
| 44b     | 23856          | 24209         | 76        | 9.1            | chaperone gpT           | Programmed frame shift, fused to orf44a,                                           |                 |
| 45      | 24209          | 26488         | 759       | 79.9           | Tail tape measure       | <i>Bifidobacterium catenulatum</i> phage tape measure protein                      | 41 (582)        |
| 46      | 26491          | 27363         | 290       | 32.3           | Tail structural protein | <i>E. faecalis phage</i> phiFL4A tail protein gp49                                 | 42 (291)        |
| 47      | 27365          | 28480         | 371       | 42.0           |                         | <i>E. faecalis phage</i> phiFL4A gp50                                              | 45 (365)        |
| 48      | 28477          | 29505         | 342       | 37.7           | Baseplate component     | Tuc2009 BppL, receptor binding protein                                             | 73 (159)        |
| 49      | 29519          | 29743         | 74        | 8.6            |                         | Hypothetical phi31                                                                 | 100 (74)        |
| 50      | 29757          | 30044         | 95        | 10.56          | Holin                   | BK5-T holin                                                                        | 100 (95)        |
| 51      | 30044          | 30823         | 259       | 28.0           | Endolysin               | Phi31 lysin                                                                        | 99 (259)        |
| 52      | 30937          | 31101         | 54        | 6.4            |                         | Tuc2009_56                                                                         | 93 (43)         |

| <b>BM13</b>    |              |             |                  |                 |                             |                                                                                         |                        |
|----------------|--------------|-------------|------------------|-----------------|-----------------------------|-----------------------------------------------------------------------------------------|------------------------|
| <b>Orf no.</b> | <b>Start</b> | <b>Stop</b> | <b>Size (aa)</b> | <b>MW (kDa)</b> | <b>Predicted function</b>   | <b>Highest BlastP phage hit</b>                                                         | <b>% identity (aa)</b> |
| 1              | 127          | 351         | 74               | 8.5             | Cro-Like repressor          | ORF2 4268                                                                               | 99 (74)                |
| 2              | 378          | 1094        | 238              | 27.7            | Anti-repressor              | ORF3 4268                                                                               | 98 (237)               |
| 3              | 1108         | 1302        | 64               | 7.2             |                             |                                                                                         |                        |
| 4              | 1314         | 1952        | 212              | 24.6            |                             |                                                                                         |                        |
| 5              | 2127         | 2369        | 80               | 9.1             | Repressor                   | ORF1531 <i>L. lactis</i> KF147 prophage                                                 | 64 (184)               |
| 6              | 2382         | 2702        | 106              | 11.9            |                             | ORF7 bIL309                                                                             | 95 (79)                |
| 7              | 2712         | 3452        | 246              | 28.4            | Regulatory protein          | ORF1878 <i>L. lactis</i> CV56 prophage                                                  | 81 (101)               |
| 8              | 3465         | 3659        | 64               | 7.3             |                             | ORF0737 <i>S. aureus</i> 21305 prophage                                                 | 39 (240)               |
| 9              | 3704         | 3940        | 78               | 9.1             |                             | ORF1876 <i>L. lactis</i> CV56 prophage                                                  | 97 (64)                |
| 10             | 4038         | 4434        | 131              | 14.9            |                             | ORF10 ul36                                                                              | 99 (77)                |
| 11             | 4443         | 4958        | 171              | 19.3            | Sak                         | ORF13 <i>L. lactis</i> phage bIL286                                                     | 99 (131)               |
| 12             | 4972         | 5523        | 183              | 21.0            | SSB                         | ORF163 ul36.13                                                                          | 97 (130)               |
| 13             | 5672         | 6391        | 239              | 27.9            | DNA rep protein             | ORF183 ul36.13                                                                          | 97 (183)               |
| 14             | 6401         | 7291        | 296              | 34.2            | Helicase                    | ORF11 r1t                                                                               | 98 (244)               |
| 15             | 7300         | 7464        | 54               | 6.4             |                             | ORF12 r1t                                                                               | 99 (296)               |
| 16             | 7454         | 7843        | 129              | 15.7            | Resolvase                   | ORF13 r1t                                                                               | 94 (54)                |
| 17             | 7846         | 8085        | 79               | 9.5             |                             | ORF18 bIL285                                                                            | 99 (129)               |
| 18             | 8196         | 8402        | 68               | 8.3             |                             | ORF18 ul36                                                                              | 96 (79)                |
| 19             | 8557         | 8736        | 59               | 6.9             |                             | ORF19 ul36                                                                              | 99 (68)                |
| 20             | 8726         | 9295        | 189              | 22.4            |                             | ORF19 Tuc2009                                                                           | 98 (59)                |
| 21             | 9305         | 9577        | 90               | 10.4            |                             | ORF18 r1t                                                                               | 93 (189)               |
| 22             | 9574         | 10122       | 182              | 21.3            |                             | ORF26 bIL285                                                                            | 97 (90)                |
| 23             | 10122        | 10694       | 190              | 8.5             | HNH endonuclease            | ORF0996 <i>L. lactis</i> CV56 prophage                                                  | 55 (230)               |
| 24             | 10691        | 11110       | 139              | 15.4            | dUTPase                     | ORF11 <i>S. gordonii</i> phage PH15                                                     | 44 (185)               |
| 25             | 11183        | 11335       | 50               | 5.8             |                             | ORF17 P335                                                                              | 95 (139)               |
| 26             | 11340        | 11882       | 180              | 20.5            |                             | ORF18 P335                                                                              | 97 (38)                |
| 27             | 11909        | 12601       | 230              | 26.4            |                             | ORF25 ul36                                                                              | 62 (78)                |
| 28             | 12598        | 12843       | 81               | 9.6             |                             | ORF230 phi31.1                                                                          | 100 (230)              |
| 29             | 12840        | 13040       | 66               | 8.1             |                             | ORF80 phi31.1                                                                           | 99 (68)                |
| 30             | 13048        | 13233       | 61               | 6.9             |                             | ORF66 phi31.1                                                                           | 100 (66)               |
| 31             | 13237        | 13449       | 70               | 8.4             |                             | ORF1855 <i>L. lactis</i> CV56 prophage                                                  | 100 (61)               |
| 32             | 13527        | 13937       | 136              | 16.3            | Transcriptional activator   | hypothetical                                                                            |                        |
| 33             | 14089        | 14499       | 136              | 15.4            |                             | ORF1117 <i>L. garvieae</i> ATCC 49156 prophage                                          | 49 (79)                |
| 34             | 14489        | 15730       | 413              | 46.9            | Terminase large subunit     | hypothetical                                                                            |                        |
| 35             | 15730        | 17151       | 473              | 54.2            | Portal                      | <i>E. faecalis</i> phage phiFL4A large terminase subunit                                | 66 (410)               |
| 36             | 17156        | 18205       | 349              | 39.6            | Minor head protein          | <i>E. faecalis</i> phage phiFL4A, portal protein                                        | 54 (468)               |
| 37             | 18181        | 18317       | 44               | 5.2             |                             | <i>E. faecalis</i> phage phiFL4A gp35, capsid protein                                   | 48 (275)               |
| 38             | 18459        | 19061       | 200              | 23.1            | Scaffold structural protein | ORF34 TP901-1                                                                           | 76 (38)                |
| 39             | 19073        | 19315       | 80               | 8.8             |                             | hypothetical                                                                            |                        |
| 40             | 19331        | 20227       | 298              | 32.2            | Major capsid protein        | ORF2124 <i>S. dysgalactis</i> SK1249 prophage                                           | 57 (165)               |
| 41             | 20363        | 20929       | 188              | 21.5            | Structural protein          | <i>E. faecalis</i> phage phiFL4A gp41                                                   | 94 (189)               |
| 42             | 20931        | 21251       | 106              | 12.1            | Structural protein          | <i>E. faecalis</i> phage phiFL4A gp42                                                   | 52 (105)               |
| 43             | 21256        | 21675       | 139              | 15.3            | Structural protein          | <i>E. faecalis</i> phage phiFL4A gp43, possible activator of gpU (gpZ)                  | 53 (135)               |
| 44             | 21675        | 22046       | 123              | 14.7            | Structural protein          | <i>E. faecalis</i> phage phiFL4A gp44, possible tail terminator                         | 39 (122)               |
| 45             | 22046        | 22894       | 282              | 29.8            | Major tail protein          | <i>E. faecalis</i> phage phiFL4A gp45                                                   | 46 (199)               |
| 46a            | 22919        | 23266       | 115              | 12.8            |                             | <i>E. faecalis</i> phage phiFL4A gp46                                                   | 36 (143)               |
| 46b            | 23365        | 23595       | 76               | 9.1             |                             | <i>E. faecalis</i> phage phiFL4A gp47, possible programmed frame shift, fused to orf46a | 50 (72)                |
| 47             | 23595        | 25796       | 733              | 76.9            | Tape measure protein        | ORF1646 <i>B. bifidum</i> BGN4 prophage                                                 | 37 (722)               |
| 48             | 25799        | 26671       | 290              | 32.3            | Tail protein                | gp49, <i>E. faecalis</i> phage phiFL4A tail prot.                                       | 41 (291)               |
| 49             | 26673        | 27788       | 371              | 42.0            | Structural protein          | <i>E. faecalis</i> phage phiFL4A gp50                                                   | 43 (365)               |
| 50             | 27785        | 28813       | 342              | 37.6            | Base plate                  | ORF343 phiLC3                                                                           | 43 (238)               |
| 51             | 28827        | 29129       | 100              | 11.8            |                             | ORF56 ul36                                                                              | 94 (100)               |
| 52             | 29119        | 29343       | 74               | 8.1             | Holin                       | ORF57 ul36                                                                              | 96 (74)                |
| 53             | 29340        | 30629       | 429              | 46.4            | Endolysin                   | ORF58 M1 ul36                                                                           | 96 (429)               |
| 54             | 30705        | 30905       | 66               | 7.7             |                             | ORF50 r1t                                                                               | 98 (42)                |

\*Phage hits represented are lactococcal phages unless otherwise indicated
